# Supplementary material for: Evolution of the Staphylococcus argenteus ST2250 Clone in Northeastern Thailand Is Linked with the Acquisition of Livestock-Associated Staphylococcal Genes
Source: PubMed Central journal article supplement (PMC5573676; doi:10.1128/mbio.00802-17), 2017-07-05

**A**

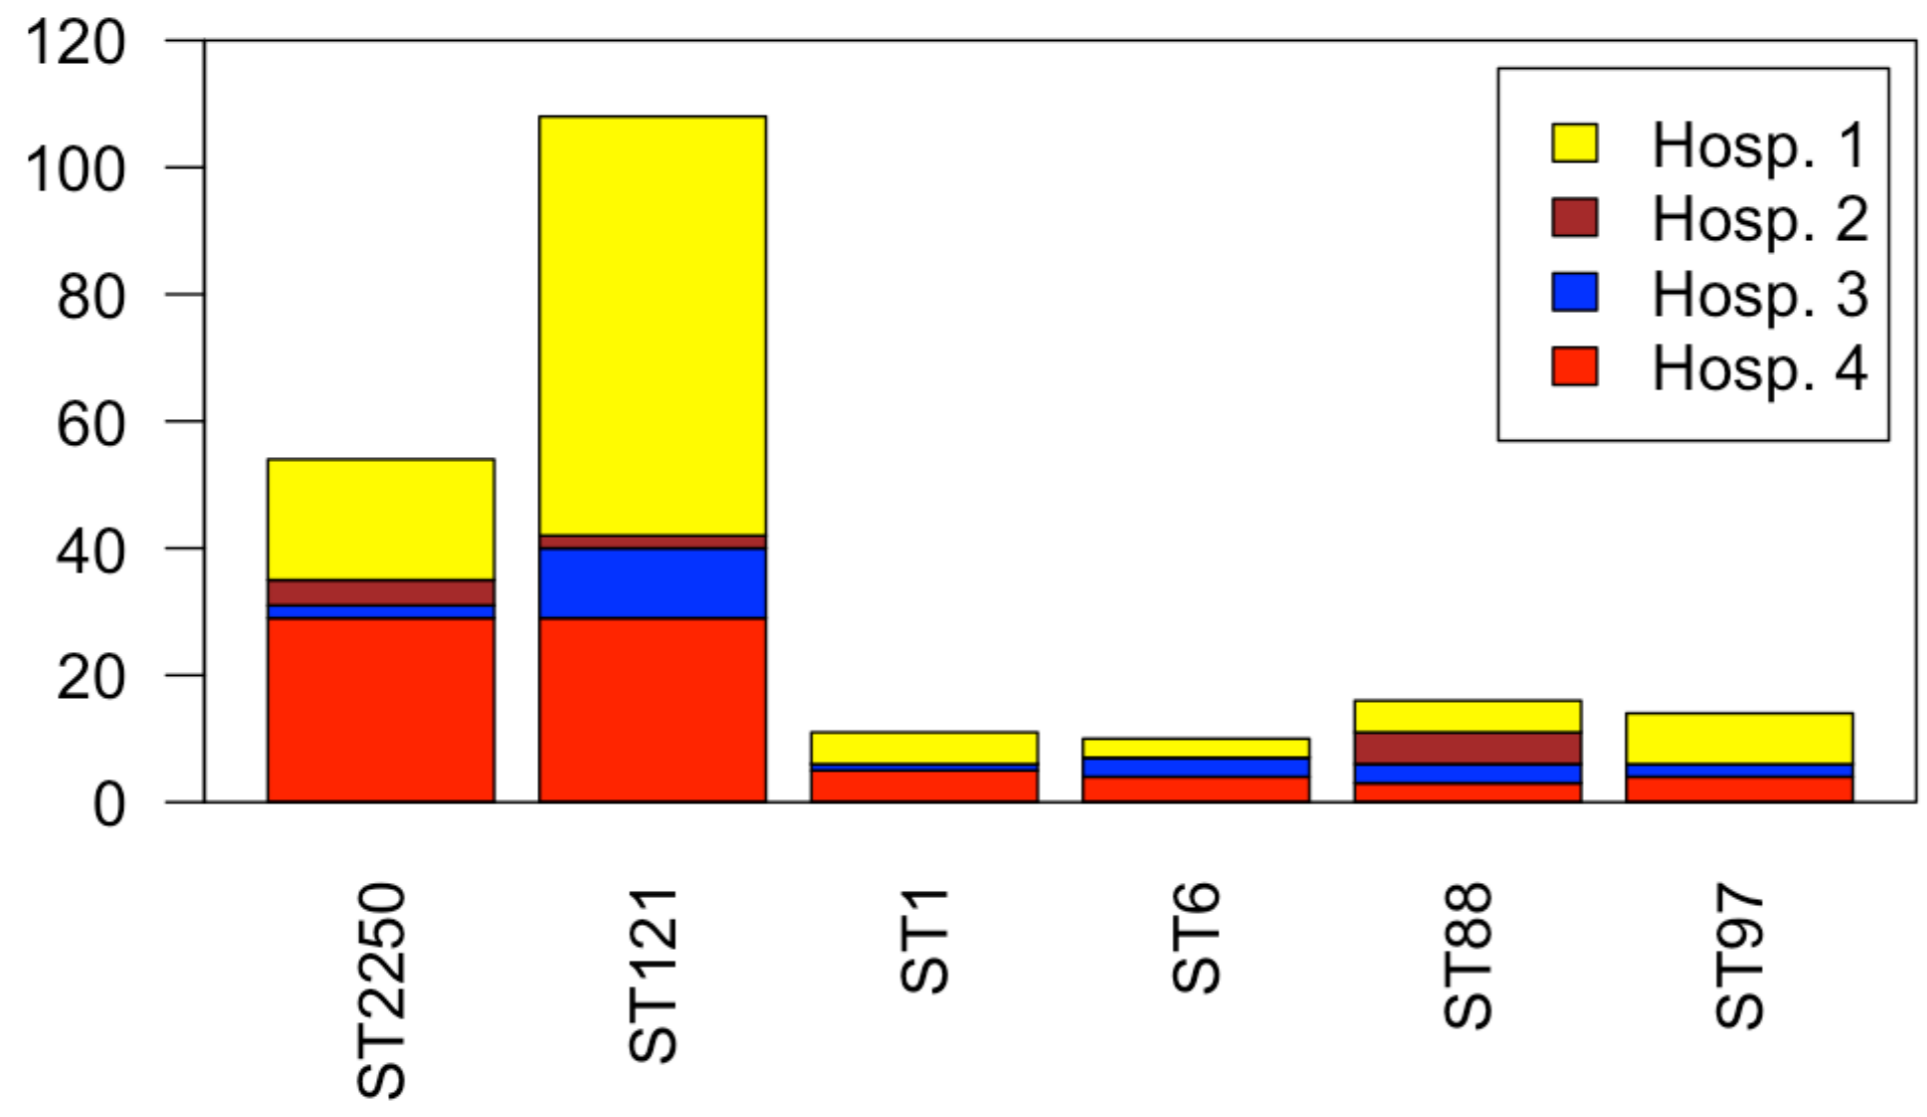

**B****ST2250**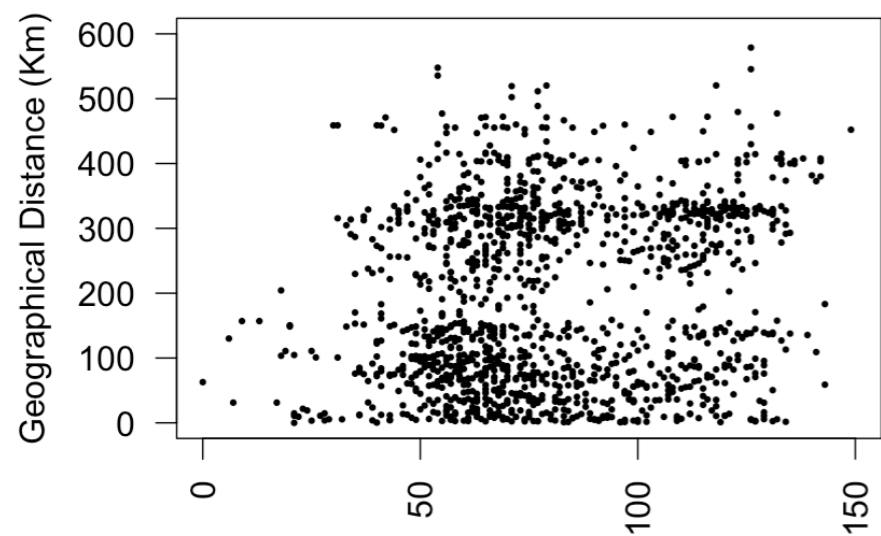**ST88**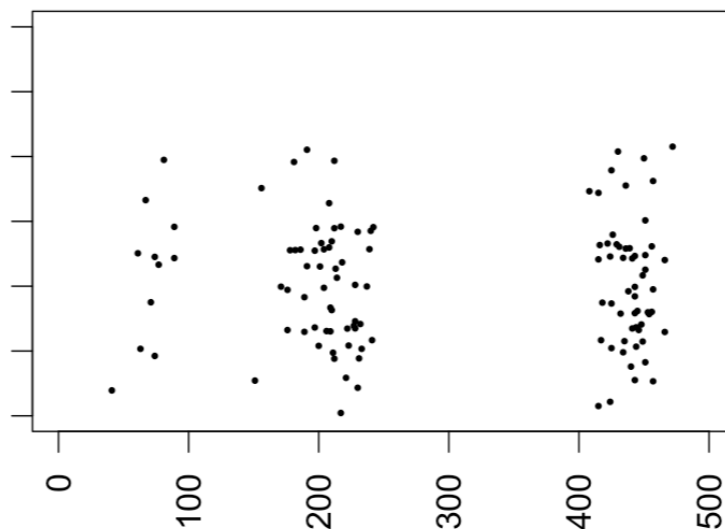**ST97**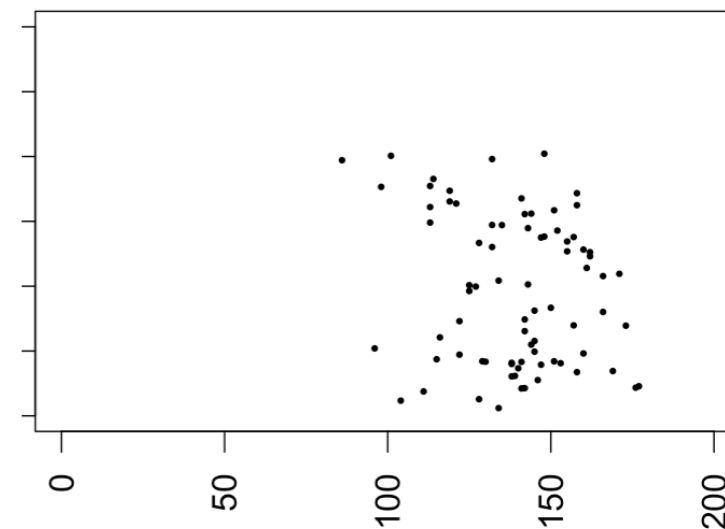**ST121**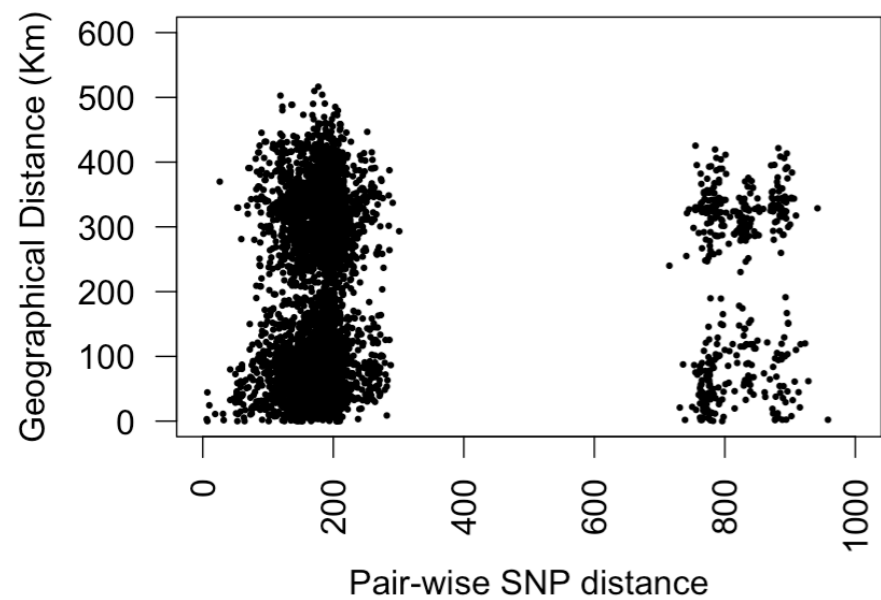**ST6**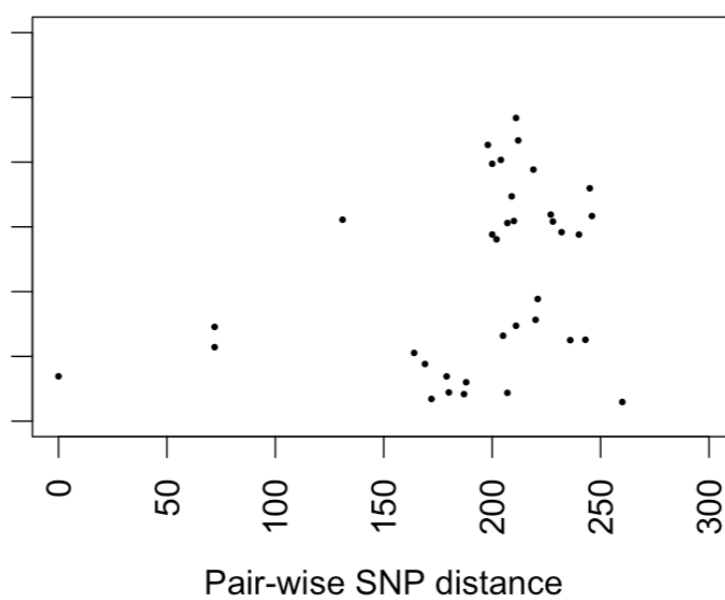**ST1**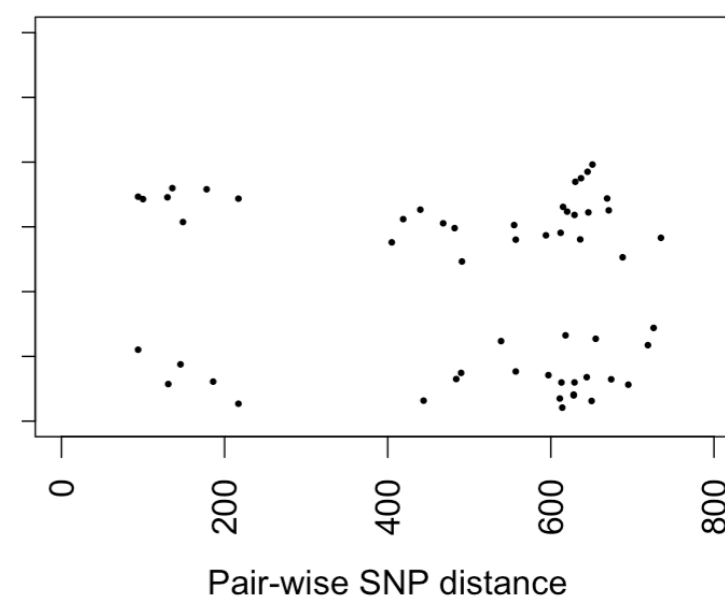

Supplement: mbo003173374sf1.pdf [file mbo003173374sf1.pdf]
