# Supplementary material for: Evolution of the Staphylococcus argenteus ST2250 Clone in Northeastern Thailand Is Linked with the Acquisition of Livestock-Associated Staphylococcal Genes
Source: PubMed Central journal article supplement (PMC5573676; doi:10.1128/mbio.00802-17), 2017-07-05

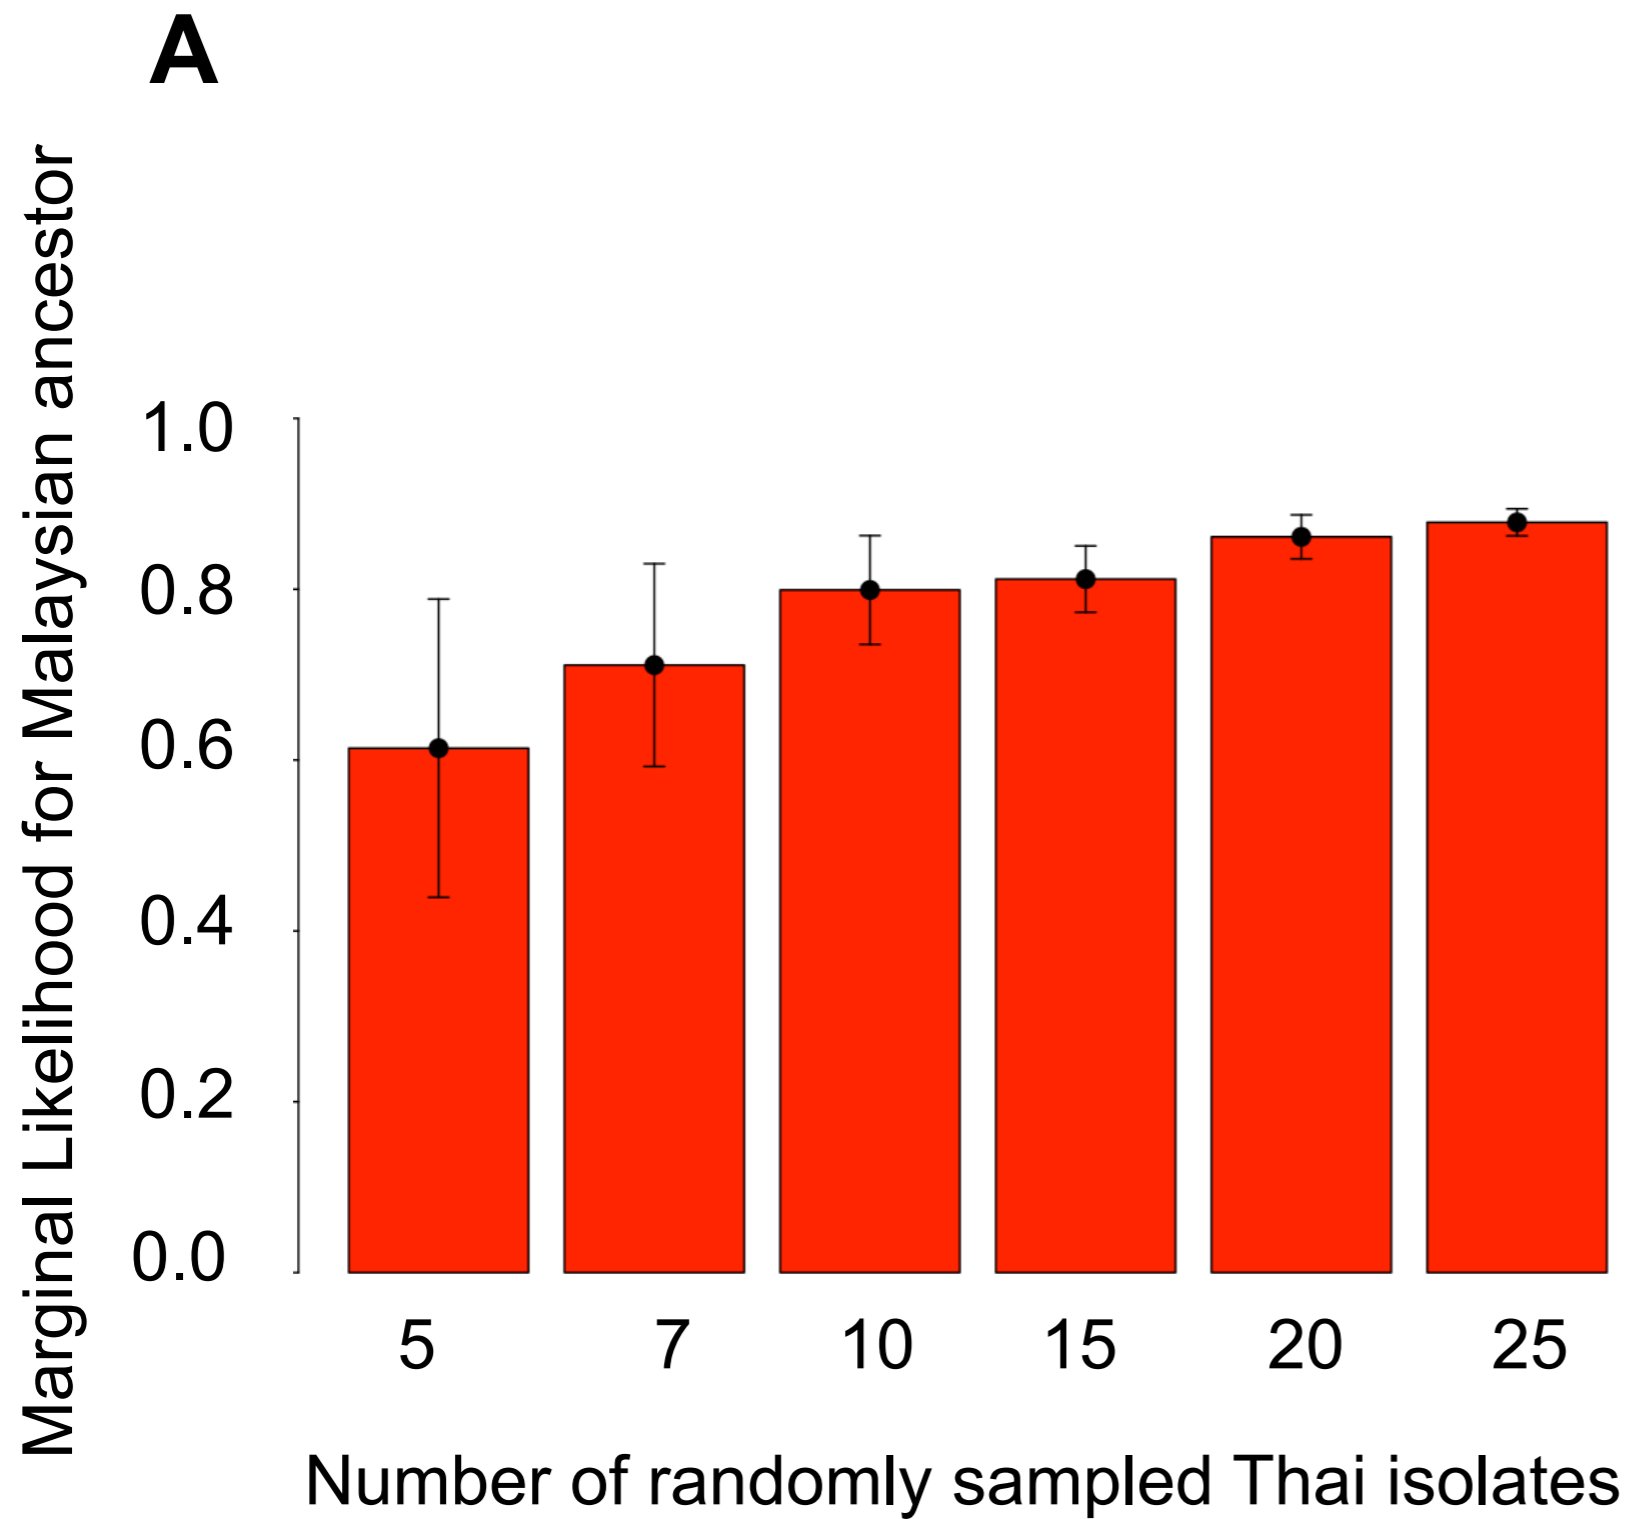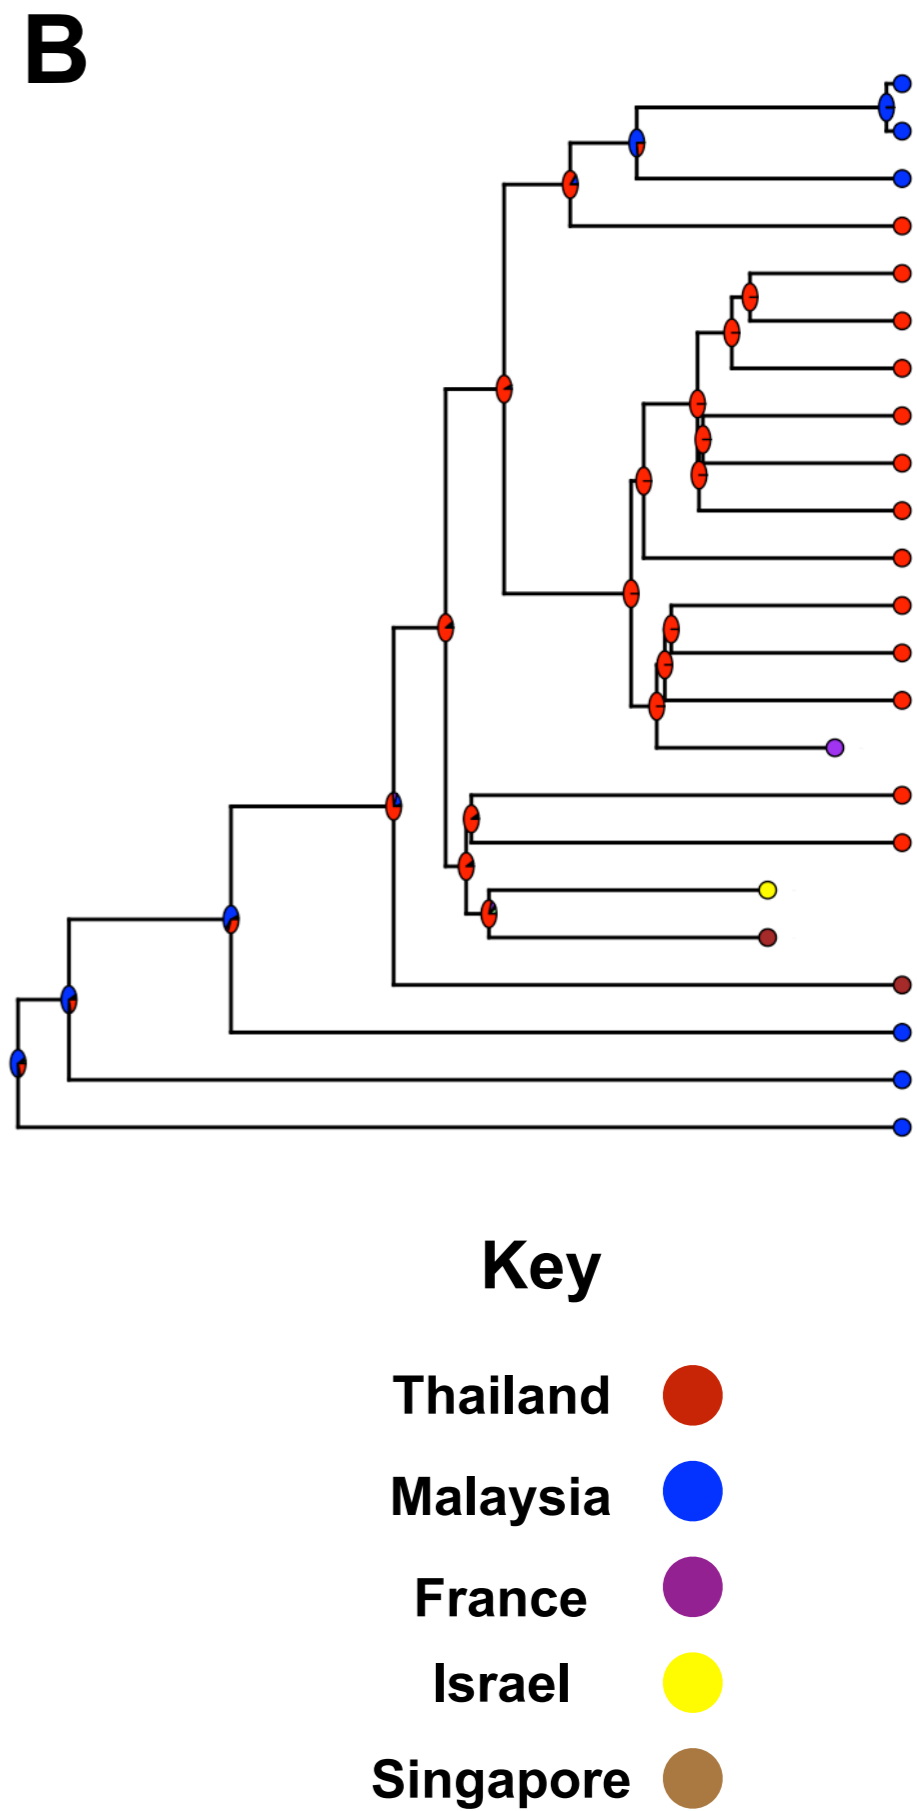

Supplement: mbo003173374sf3.pdf [file mbo003173374sf3.pdf]
