# Supplementary material for: Evolution of the Staphylococcus argenteus ST2250 Clone in Northeastern Thailand Is Linked with the Acquisition of Livestock-Associated Staphylococcal Genes
Source: PubMed Central journal article supplement (PMC5573676; doi:10.1128/mbio.00802-17), 2017-07-05
Supplement: mbo003173374sf4.pdf [file mbo003173374sf4.pdf]

| <b>Gene</b> | <b>Gene function</b>                             |
|-------------|--------------------------------------------------|
| sak         | Staphylokinase                                   |
| group_921   | GNAT family acetyltransferase                    |
| group_448   | pathogenicity island protein                     |
| group_1635  | pathogenicity island protein                     |
| group_356   | amidase                                          |
| lukS-PV     | lukS-PV                                          |
| hlgB_2      | panton-Valentine leukocidin chain F protein      |
| poIA_2      | DNA polymerase                                   |
| group_697   | transcriptional activator rinB-like protein      |
| group_1289  | pathogenicity island protein                     |
| blaR1       | regulatory protein BlaR1                         |
| dut_1       | deoxyuridine 5'-triphosphate nucleotidohydrolase |
| group_2413  | SLT orf 129-like protein                         |
| group_171   | Dimeric dUTPase                                  |

**Gene key**

|         |                                                                                             |
|---------|---------------------------------------------------------------------------------------------|
| present | <span style="display:inline-block; width:15px; height:15px; background-color:red;"></span>  |
| absent  | <span style="display:inline-block; width:15px; height:15px; background-color:blue;"></span> |

**Clade key**

|                     |                                                                                                   |
|---------------------|---------------------------------------------------------------------------------------------------|
| <i>S. argenteus</i> | <span style="display:inline-block; width:15px; height:15px; background-color:lightblue;"></span>  |
| <i>S. aureus</i>    | <span style="display:inline-block; width:15px; height:15px; background-color:lightcoral;"></span> |



5000 SNPs
