# Supplementary material for: Evolution of the Staphylococcus argenteus ST2250 Clone in Northeastern Thailand Is Linked with the Acquisition of Livestock-Associated Staphylococcal Genes
Source: PubMed Central journal article supplement (PMC5573676; doi:10.1128/mbio.00802-17), 2017-07-05

**A**

**Gene**  
 isdH\_1  
 maeA\_1  
 group\_2498  
 group\_2507  
 cas1  
 csm5

**Gene Function**  
 haptoglobin-binding surface protein  
 putative malolactic enzyme  
 AEC family malonate efflux carrier  
 Insertion sequenceATP-binding protein, putative  
 Cas1 family protein  
 Csm5 family CRISPR-associated RAMP protein

**sec-bov**  
 entQ  
 group\_5336

**enterotoxin C-bovine**  
 staphylococcal enterotoxin Q  
 hypothetical protein with DUF1433

group\_3632  
 group\_4883  
 group\_4884  
 group\_4957  
 group\_5213  
 gdmA\_1  
 apr  
 group\_5241  
 group\_5339  
 group\_5350  
 group\_5366

CRISPR-associated protein  
 coagulase family protein  
 extracellular matrix and plasma binding protein  
 putative lipoprotein  
 FIG01108398: hypothetical protein  
 lantibiotic protein  
 subtilase family protease  
 Doubtful CDS. No database matches  
 putative lipoprotein  
 virus attachment p12 family protein  
 membrane protein

hsdR\_3  
 hsdR\_2  
 group\_5423  
 cas2  
 csm1  
 csm2  
 csm3  
 group\_5428  
 cas6  
 group\_5430  
 group\_5431  
 group\_5432  
 group\_5433  
 group\_5438

type I restriction-modification system endonuclease (fragment)  
 type I restriction-modification system endonuclease (fragment)  
 type I restriction-modification system specificity protein (fragment)  
 CRISPR-associated protein Cas2  
 CRISPR-associated Csm1 family protein  
 CRISPR-associated Csm2 protein  
 Csm3 family CRISPR-associated RAMP protein  
 CRISPR-associated Csm4 family protein  
 CRISPR-associated protein C  
 putative reverse transcriptase  
 hypothetical protein  
 hypothetical protein  
 hypothetical protein  
 Membrane lipoprotein

group\_5506  
 group\_5509

Repetitive hypothetical protein  
 Putative cytosolic protein

group\_5536  
 group\_5537  
 group\_5538  
 group\_5539  
 group\_5540  
 lpl2\_2  
 group\_5545  
 group\_5546

exotoxin  
 exotoxin set-1..2...3.. on the same operon  
 putative restriction and modification system specificity protein  
 exotoxin  
 putative surface protein  
 Membrane lipoprotein  
 putative lipoprotein  
 lipase family protein

**B**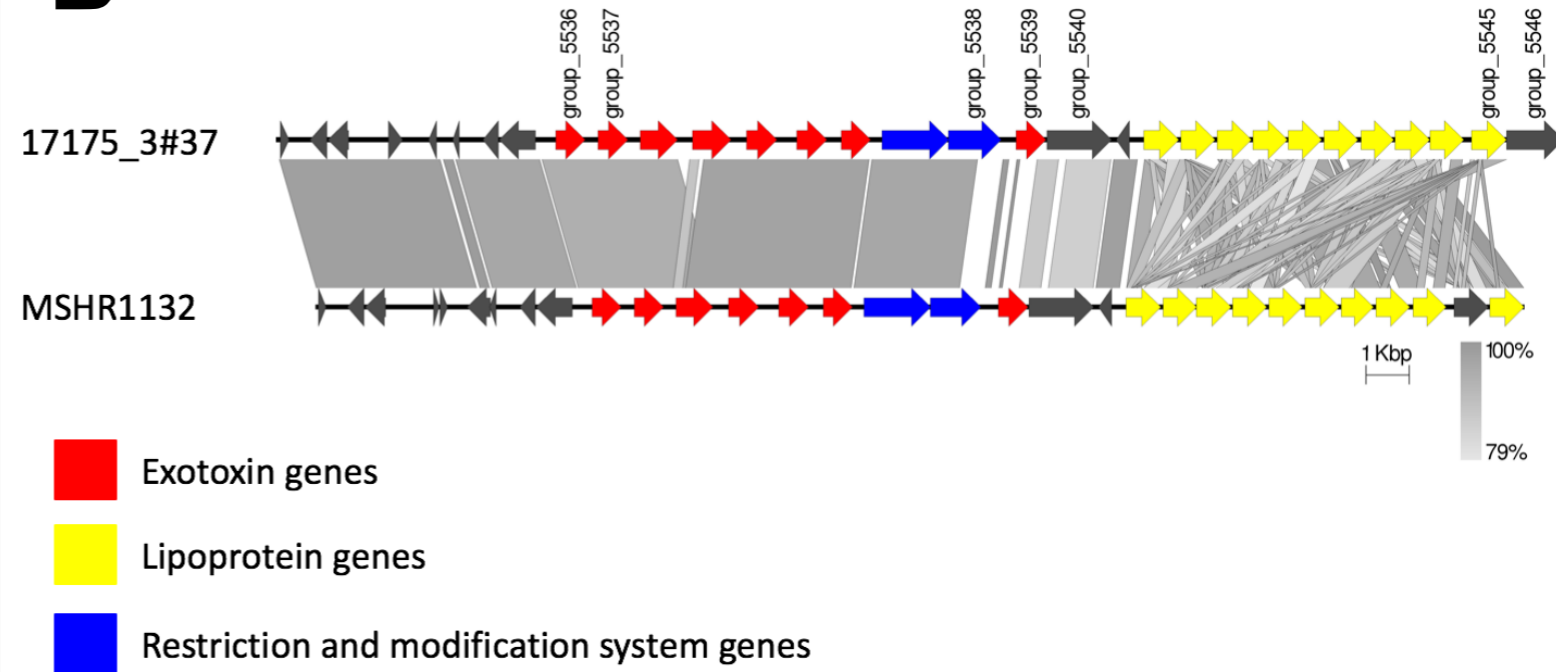

Supplement: mbo003173374sf6.pdf [file mbo003173374sf6.pdf]
